# Supplementary material for: Use of Integrated Core Proteomics, Immuno-Informatics, and In Silico Approaches to Design a Multiepitope Vaccine against Zoonotic Pathogen Edwardsiella tarda
Source: MDPI journal article supplement (doi:10.3390/applmicrobiol2020031), 2022-06-18
Supplement: s1 [file s1]

**Supplementary Table S1.** List of subcellular localization of 134 proteins of *E. tarda*.

| Accession Number | Subcellular Localization |
|------------------|--------------------------|
| WP_005281935.1   | Inner Membrane           |
| WP_035605308.1   | Periplasmic              |
| ACY84110.1       | Outer Membrane           |
| WP_157757873.1   | Extracellular            |
| WP_005280555.1   | Inner membrane           |
| WP_005280774.1   | Outer membrane           |
| WP_198404583.1   | Extracellular            |
| WP_157757876.1   | Extracellular            |
| WP_157757880.1   | Extracellular            |
| WP_157757873.1   | Extracellular            |
| WP_157757856.1   | Extracellular            |
| WP_157757887.1   | Extracellular            |
| WP_146197252.1   | Extracellular            |
| WP_144413601.1   | Extracellular            |
| WP_127519436.1   | Extracellular            |
| WP_005281452.1   | Extracellular            |
| WP_097364786.1   | Extracellular            |
| WP_005281117.1   | Extracellular            |
| WP_161598454.1   | Extracellular            |
| WP_005280990.1   | Extracellular            |
| WP_198404585.1   | Extracellular            |
| WP_005280558.1   | Extracellular            |
| WP_005281400.1   | Extracellular            |
| WP_000135199.1   | Extracellular            |
| WP_005281507.1   | Extracellular            |
| WP_005280548.1   | Extracellular            |
| WP_097364781.1   | Extracellular            |
| WP_005280628.1   | Extracellular            |
| WP_002211347.1   | Extracellular            |
| WP_001029684.1   | Extracellular            |
| WP_005282049.1   | Extracellular            |
| WP_198404601.1   | Inner Membrane           |
| WP_198404604.1   | Inner Membrane           |
| WP_198404602.1   | Inner Membrane           |
| WP_198404599.1   | Inner Membrane           |
| WP_198404597.1   | Inner Membrane           |
| WP_198404596.1   | Inner Membrane           |
| WP_198404595.1   | Inner Membrane           |
| WP_198404588.1   | Inner Membrane           |
| WP_198404586.1   | Inner Membrane           |
| WP_198404577.1   | Inner Membrane           |
| WP_198404573.1   | Inner Membrane           |
| WP_198404572.1   | Inner Membrane           |
| WP_172953290.1   | Inner Membrane           |
| WP_172460020.1   | Inner Membrane           |
| WP_172460016.1   | Inner Membrane           |
| WP_172460015.1   | Inner Membrane           |
| WP_165798028.1   | Inner Membrane           |
| WP_165798002.1   | Inner Membrane           |
| WP_157757881.1   | Inner Membrane           |
| WP_157757862.1   | Inner Membrane           |
| WP_127519437.1   | Inner Membrane           |
| WP_109728462.1   | Inner Membrane           |

|                |                |
|----------------|----------------|
| WP 098143262.1 | Inner Membrane |
| WP 097364800.1 | Inner Membrane |
| WP 097364798.1 | Inner Membrane |
| WP 097364784.1 | Inner Membrane |
| WP 000242755.1 | Inner Membrane |
| WP 097364564.1 | Inner Membrane |
| WP 097364562.1 | Inner Membrane |
| WP 097364785.1 | Inner Membrane |
| WP 097364560.1 | Inner Membrane |
| WP 097364559.1 | Inner Membrane |
| WP 097364555.1 | Inner Membrane |
| WP 097364554.1 | Inner Membrane |
| WP 097364553.1 | Inner Membrane |
| WP 097364783.1 | Inner Membrane |
| WP 097364552.1 | Inner Membrane |
| WP 198404603.1 | Outer membrane |
| WP 198404594.1 | Outer membrane |
| WP 198404576.1 | Outer membrane |
| WP 172953319.1 | Outer membrane |
| WP 172953316.1 | Outer membrane |
| WP 172460013.1 | Outer membrane |
| WP 172460007.1 | Outer membrane |
| WP 172460003.1 | Outer membrane |
| WP 172460001.1 | Outer membrane |
| WP 157757886.1 | Outer membrane |
| WP 157757867.1 | Outer membrane |
| WP 109691518.1 | Outer membrane |
| WP 109579541.1 | Outer membrane |
| WP 005281705.1 | Outer membrane |
| WP 005280765.1 | Outer membrane |
| WP 005281722.1 | Outer membrane |
| WP 097364556.1 | Outer membrane |
| WP 005281771.1 | Outer membrane |
| WP 005281800.1 | Outer membrane |
| WP 005281867.1 | Outer membrane |
| WP 097364561.1 | Outer membrane |
| WP 005281915.1 | Outer membrane |
| WP 005282534.1 | Outer membrane |
| WP 157757889.1 | Outer membrane |
| WP 157757878.1 | Outer membrane |
| WP 109579403.1 | Outer membrane |
| WP 097364803.1 | Outer membrane |
| WP 097364801.1 | Outer membrane |
| WP 005282973.1 | Outer membrane |
| WP 165798010.1 | Outer membrane |
| WP 005280774.1 | Outer membrane |
| WP 005282547.1 | Outer membrane |
| WP 005282937.1 | Outer membrane |
| WP 005282997.1 | Outer membrane |
| WP 005283228.1 | Outer membrane |
| WP 005280463.1 | Outer membrane |
| WP 005284036.1 | Outer membrane |
| WP 157757874.1 | Periplasmic    |
| WP 157757866.1 | Periplasmic    |
| WP 198404593.1 | Periplasmic    |
| WP 198404592.1 | Periplasmic    |

|                |             |
|----------------|-------------|
| WP 198404591.1 | Periplasmic |
| WP 198404590.1 | Periplasmic |
| WP 198404589.1 | Periplasmic |
| WP 198404587.1 | Periplasmic |
| WP 198404584.1 | Periplasmic |
| WP 198404582.1 | Periplasmic |
| WP 198404581.1 | Periplasmic |
| WP 198404580.1 | Periplasmic |
| WP 198404579.1 | Periplasmic |
| WP 198404578.1 | Periplasmic |
| WP 198404575.1 | Periplasmic |
| WP 172953296.1 | Periplasmic |
| WP 172460012.1 | Periplasmic |
| WP 172460010.1 | Periplasmic |
| WP 157757890.1 | Periplasmic |
| WP 157757888.1 | Periplasmic |
| WP 157757885.1 | Periplasmic |
| WP 157757884.1 | Periplasmic |
| WP 157757883.1 | Periplasmic |
| WP 157757882.1 | Periplasmic |
| WP 157757879.1 | Periplasmic |
| WP 157757877.1 | Periplasmic |
| WP 157757875.1 | Periplasmic |
